# Supplementary material
Source: PubMed Central journal article supplement (PMC4286233)
Supplement: 8e999de125d6030c520e91e233defec3_genetics.113.160556-12.pdf [file 8e999de125d6030c520e91e233defec3_genetics.113.160556-12.pdf]

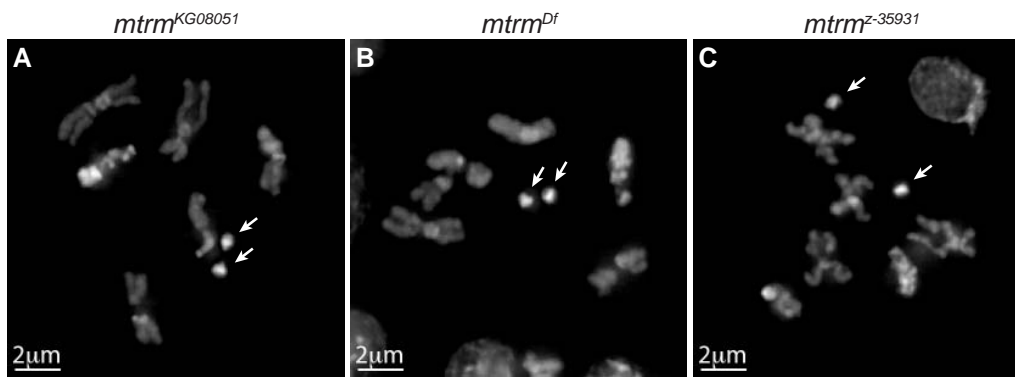

**Figure S8** Other *mtrm* mutant stocks, including the progenitor of the *mtrm*<sup>126</sup> stock, do not contain *B* chromosomes. (A) Larval neuroblast from the *mtrm*<sup>126</sup> progenitor stock, (*y*<sup>1</sup>; *PSUPor-Pexo70*<sup>KG08051</sup> *mtrm*<sup>KG08051</sup> *ry*<sup>506</sup>/*TM3*, *Sb*<sup>1</sup> *Ser*<sup>1</sup>). (B) Larval neuroblast of the *y w/y+*; *Df(3L)66CT2-T10/TM3*, *Sb*, *Ser*; *spa*<sup>pol</sup> deficiency stock uncovering *mtrm*. (C) Larval neuroblast of a *mtrm* mutation discovered in the Zuker collection (*mtrm*<sup>z-35931</sup>/*TM6B*).
