# Supplementary material
Source: PubMed Central journal article supplement (PMC4286233)
Supplement: 982053f4c45443c7b30d8919d2f018be_genetics.113.160556-3.pdf [file 982053f4c45443c7b30d8919d2f018be_genetics.113.160556-3.pdf]

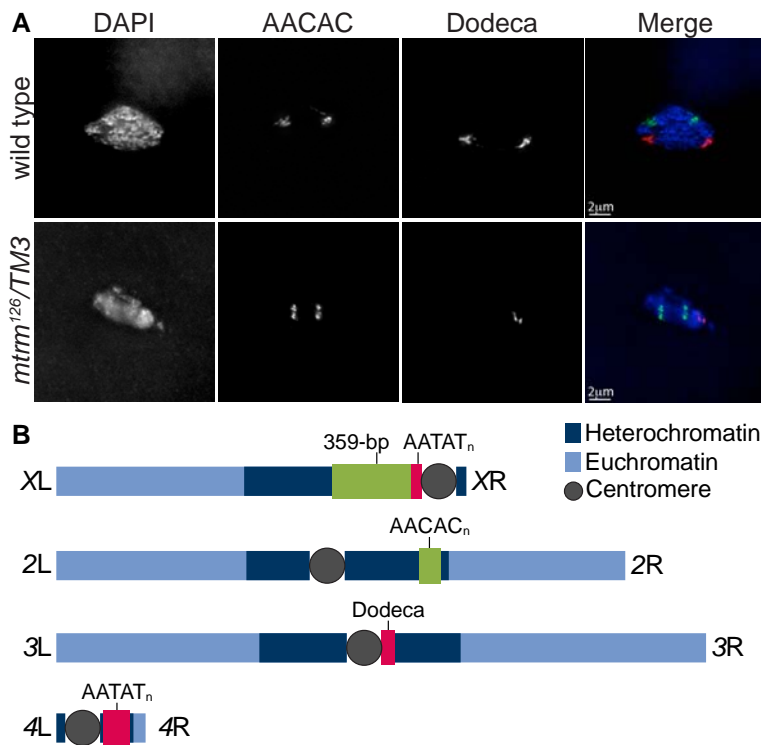

**Figure S2** *B* chromosomes do not contain heterochromatic sequences from either the 2<sup>nd</sup> or the 3<sup>rd</sup> chromosomes. (A) Prometaphase I oocytes labeled with DAPI (blue) and probes to the AACAC heterochromatic repeat on the 2<sup>nd</sup> chromosome (green) and to the Dodeca heterochromatic probe of the 3<sup>rd</sup> chromosomes (red). Neither wild-type nor *mtrm*<sup>126</sup>/*TM3* oocytes show aberrant staining. (B) Schematic showing the location of the 359-bp probe on the X chromosome, the AACAC<sub>n</sub> probe on 2R, the Dodeca probe on 3R, and the AATAT<sub>n</sub> probe on the 4<sup>th</sup> chromosome.
