# Supplementary material
Source: PubMed Central journal article supplement (PMC4286233)
Supplement: c8d355307fdaa7655b69fa1bd78257a2_genetics.113.160556-14.pdf [file c8d355307fdaa7655b69fa1bd78257a2_genetics.113.160556-14.pdf]

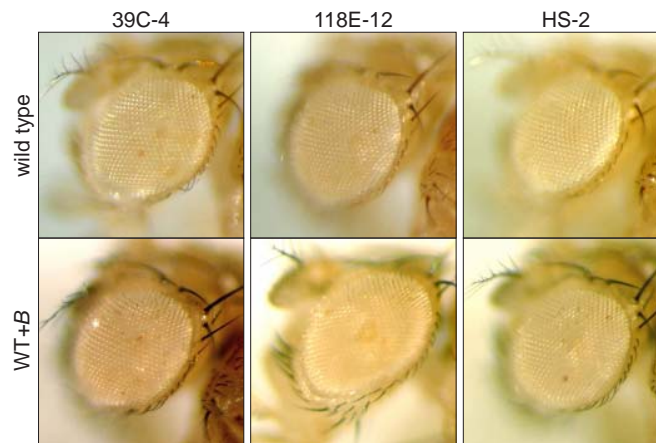

**Figure S7** Some PEV reporters were unaffected by the presence of *B* chromosomes. Three insertion reporter lines with the  $w^+$  gene inserted in the pericentric region of chromosomes 2L (39C-4), 3R (118E-12), and 3L (HS-2) were not affected by the presence of *B* chromosomes. Females carrying the reporters were crossed to males of the indicated genotypes.
