# Supplementary material
Source: PubMed Central journal article supplement (PMC4286233)
Supplement: c80e1931e83ee697b01b83e162e97c6f_genetics.113.160556-11.pdf [file c80e1931e83ee697b01b83e162e97c6f_genetics.113.160556-11.pdf]

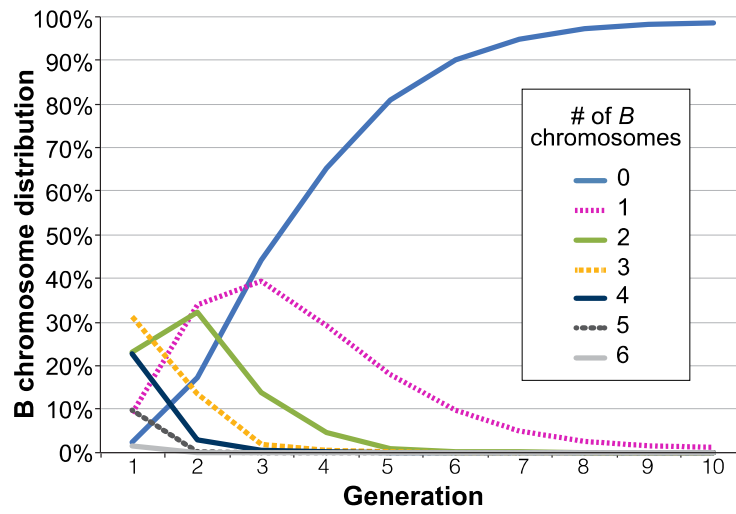

**Figure S6** Simulation of 10 generations of outcrossing. Assuming 1,000 flies per generation, the number of *B* chromosomes quickly drops to zero for the majority of flies in the outcross model and *B* chromosomes are almost completely absent from the stock by generation 10.
